1 **Dynamic regulation of the *Trypanosoma brucei* transferrin receptor in response to iron starvation**  
2 **is mediated *via* the 3'UTR**

3

4 Short title: The *T. brucei* transferrin receptor is regulated via 3'UTR

5

6 Corinna Benz,<sup>1</sup> Winston Lo,<sup>1</sup> Nadin Fathallah,<sup>1</sup> Ashley Connor-Guscott,<sup>1</sup> Henry J. Benns,<sup>1</sup> Michael D  
7 Urbaniak<sup>1\*</sup>

8

9 <sup>1</sup> Biomedical and Life Sciences, Faculty of Health and Medicine, Lancaster University, Lancaster LA1  
10 4YG, UK

11 \* Corresponding author

12 E-mail: [m.urbaniak@lancaster.ac.uk](mailto:m.urbaniak@lancaster.ac.uk)

13

14 **Abstract**

15 The bloodstream form of the parasite *Trypanosoma brucei* obtains iron from its mammalian host by  
16 receptor-mediated endocytosis of host transferrin through its own unique transferrin receptor  
17 (*TbTfR*). Expression of *TbTfR* rapidly increases upon iron starvation by post-transcriptional regulation  
18 through a currently undefined mechanism that is distinct from the mammalian iron response system.  
19 We have created reporter cell lines by fusing the *TbTfR* 3'UTR or a control Aldolase 3'UTR to reporter  
20 genes encoding GFP or firefly Luciferase, and inserted the fusions into a bloodstream form cell line at  
21 a tagged ribosomal RNA locus. Fusion of the *TbTfR* 3'UTR is sufficient to significantly repress the  
22 expression of the reporter proteins under normal growth conditions. Under iron starvation conditions

23 we observed upregulation of the *TbTfR* 3'UTR fusions only, with a magnitude and timing consistent  
24 with that reported for upregulation of the *TbTfR*. We conclude that the dynamic regulation of the *T.*  
25 *brucei* transferrin receptor in response to iron starvation is mediated *via* its 3'UTR, and that the effect  
26 is independent of genomic location.

## 27 **Introduction**

28 The obligate extracellular parasite *Trypanosoma brucei* has a complex digenetic lifecycle between a  
29 tsetse fly vector and a range of mammalian hosts. The bloodstream form of *T. brucei* has evolved a  
30 unique transferrin receptor (*TbTfR*) that allows it to obtain the essential element iron through receptor  
31 mediated endocytosis of host transferrin (Tf) (1, 2). Different *TbTfR* genes encode proteins with  
32 varying affinities for Tf from different mammals, and the occurrence of multiple *TbTfR* genes has been  
33 suggested to allow the parasite to adapt to a wide host range (3, 4).

34 A subset of *T. brucei* genes are transcribed by RNA polymerase I (RNA pol I), including the essential  
35 Variant Surface Glycoprotein (VSG) which forms a dense surface coat that enables the parasite to  
36 evade the host's innate and adaptive immune responses, and which undergoes antigenic variation  
37 from a repertoire of ~1500 VSG genes (5). Of the 15 subtelomeric VSG bloodstream expression sites  
38 (BES), only one is active at a time so that a single VSG is transcribed from a discrete location within the  
39 nucleus (6). Antigenic variation requires replacement of the VSG within the active BES or a switch to a  
40 different BES, with the latter also causing a change in the expressed complement of expression site  
41 associated genes (*ESAGs*) that are located on the VSG polycistronic transcriptional unit. The VSG  
42 promoter proximal genes *ESAG6* & *ESAG7* form the heterodimeric *TbTfR* (1), which is evolutionarily  
43 distinct from mammalian TfR and structurally resembles a truncated VSG homodimer (7). Both  
44 monomers of *TbTfR* are extensively *N*-glycosylated and are membrane associated via the GPI anchor  
45 present on *ESAG6* (8).

46 Under basal conditions only  $3 \times 10^3$  *TbTfR* heterodimers (1) are expressed despite *ESAG6* & 7 being  
47 located on the same polycistronic transcriptional unit as the highly abundant *VSG* ( $5 \times 10^6$   
48 homodimers). Under iron starvation conditions expression of the *TbTfR* rapidly increases equally at  
49 the mRNA and protein level, with lack of increase in *VSG* mRNA suggesting that regulation occurs  
50 through a currently undefined post-transcriptional mechanism (9, 10). Reducing the uptake of iron  
51 using the iron chelator deferoxamine, culturing with different mammalian serum, incubation with  
52 anti-TfR antibodies, or competition with apo-Tf all result in a rapid 2.5 – 5-fold upregulation of the  
53 *TbTfR* and a corresponding increase in Tf uptake (4, 9-11). Interestingly, *TbTfR* upregulation occurs  
54 before intracellular iron stores are depleted and cells continue to divide for 48 h, suggesting that cells  
55 are responding to changes in iron flux. The mechanism is distinct from the post-transcriptional Iron  
56 Response Element (IRE) / Iron Response Protein (IRP) system found in mammals, as knockout of the  
57 *T. brucei* IRP-1 homologue aconitase has no effect on *TbTfR* regulation (9). As *TbTfR* is a multi-gene  
58 family that occurs in an atypically regulated locus, and available antibodies cross-react with different  
59 *ESAG6* & 7 glycoproteins, the direct study of *TbTfR* regulation is challenging.

60 The BES commonly active in *T. brucei* bloodstream form culture adapted strains (BES1, expressing  
61 *VSG221*) contains *ESAG6* & 7 genes with nanomolar affinity for bovine Tf, but that binds canine Tf only  
62 poorly (3, 4). Prolonged iron starvation (>7 days) induced by changing from growth in media  
63 supplemented with bovine serum to canine serum selects for cells that have altered the identity of  
64 the expressed *ESAG6* & 7 and *VSG*, either by switching to another BES or replacing the genes in the  
65 active BES1 (4, 11). Switching events can be prevented by supplementing the canine serum with  
66 bovine Tf, demonstrating that the adaption is driven by iron starvation (3). Under normal physiological  
67 conditions the concentration of available host Tf is unlikely to limit trypanosome growth, but uptake  
68 may become limiting in later stages of an infection when competition with anti-*TbTfR* antibodies  
69 and/or host anaemia come into consideration (11, 12).

70 There is mounting evidence of the importance of the 3'UTR in the post-transcriptional regulation of  
71 developmentally regulated genes in *T. brucei*. The stage-specific regulation of both RNA pol I

72 transcribed VSG (13) and procyclin (14), and the RNA pol II transcribed COX genes (15) has been  
73 demonstrated to occur, at least in part, due to recognition of motifs within their respective 3'UTRs.  
74 The developmental regulation of *ESAG9* depends on a 34-nucleotide bifunctional element in the 3'UTR  
75 that confers both positive and negative regulation (16), and an RNA binding protein that negatively  
76 regulates *ESAG9* has recently been identified through a genome-wide RNA interference screen (17).  
77 Here, we investigate the importance of the *TbTfR* 3'UTR in the dynamic regulation of *TbTfR* in response  
78 to iron starvation using a simplified reporter system. By fusing the *ESAG6*-3'UTR to reporter genes  
79 encoding GFP or firefly Luciferase (fLUC), we demonstrate that the 3'UTR alone is sufficient to confer  
80 dynamic regulation of gene expression in response to iron starvation.

81

## 82 **Material and methods**

83

### 84 **Cell lines**

85 The culture adapted monomorphic *T. brucei brucei* Lister 427 bloodstream form 2T1 cell line (18),  
86 containing a tagged RRNA locus, were cultured in HMI-11T (19) containing 0.2 µg/mL Puromycin and  
87 0.5 µg/mL Phleomycin at 37 °C in a 5% CO<sub>2</sub> incubator. Transfected 2T1 cell lines were selected and  
88 maintained with 2.5 µg/mL Hygromycin in place of Puromycin.

89

### 90 **Cloning of ESAG6 3'UTR**

91 RNA was extracted from ~1 × 10<sup>7</sup> logarithmic phase cells using the RNeasy plus kit (Qiagen) according  
92 to the manufacturer's instructions. A two-step RT-PCR reaction was performed by first transcribing  
93 0.25 µg of RNA using an Omniscript Reverse Transcriptase (Promega) with a Oligo-dT adapter primer  
94 (5'-CGCGTCGACTAGTACTTTTTTTTTTTTTTTT-3') and then using 5 µl of the resulting cDNA as a template  
95 for a PCR amplification using Hot-start RED-Taq (Sigma) with primers specific for BES1 *ESAG6* ORF (6)

96 (5'-GCAGTACATTTGAGTCTT T-3') and the adapter sequence (5'-CGCGTCGACTAGTAC-3'). The resulting  
97 amplicon was ligated into pGEM-T-easy (Promega) prior to DNA sequencing.

98

## 99 **Generation of reporter cell lines**

100 The pRPa $\Delta^{GFP}$  X vector, a version of the pRPa $^{GFP}$  X vector (18) with tetracycline operator removed,  
101 was a kind gift from Sam Alsford, LSTHM. The firefly Luciferase (fLUC) ORF was PCR amplified from the  
102 pCRm-LUC-HYG vector (20) (a kind gift from Phillip Yates, Oregon Health & Science University, USA)  
103 using a mutagenic forward primer incorporating a *Hind*III site (underlined) to removes an internal *Apal*  
104 site (mismatch in bold) (5'-ATTATAAAGCTTATGGAAGATGCCAAAACATTAAGAA**AGGCC**CAGGG-3') and  
105 a reverse primer incorporating a *Bam*HI site (underlined) (5'-TTCGCGGATCCTCACACGGCGATCTTGC-  
106 3'). The PCR product was ligated into pGEM-T-easy (Promega) to allow DNA sequencing prior to  
107 subsequent subcloning into pRPa $\Delta^{GFP}$  X using the *Hind*III and *Bam*HI sites to replace the GFP- stuffer  
108 protein fusion, resulting in pRPa $\Delta^{fLUC}$  that contains the *fLUC* gene fused to the aldolase 3'UTR.

109 The 335bp *ESAG6* 3'UTR was PCR amplified from *T. brucei* gDNA using a forward primer incorporating  
110 *Xba*I (italics) and *Bam*HI (underlined) sites (5'-AATGATCTAGATAGGGATCCGGGAAGGATGCGAC-3') and  
111 reverse primer incorporating an *Apal* (underlined) site (5'-AATAGGGCCAGTAGAATTAGTCTAGTTT-3').  
112 Digestion with *Xba*I and *Apal* allowed subcloning into pRPa $\Delta^{GFP}$  X, replacing the stuffer protein X and  
113 creating pRPa $\Delta^{GFP}$ -*ESAG6*-3'UTR where the *GFP* gene is fused to *ESAG6*-3'UTR. Digestion of the same  
114 PCR product with *Bam*HI and *Apal* allowed subcloning into pRPa $\Delta$ -*fLUC* creating pRPa $\Delta^{fLUC}$ -*ESAG6*-  
115 3'UTR where the *fLUC* gene is fused to *ESAG6*-3'UTR. Finally, the *ESAG6*-3'UTR of pRPa $\Delta^{GFP}$ -*ESAG6*-  
116 3'UTR was replaced with the aldolase 3'UTR of pRPa $\Delta^{GFP}$  X using the *Bam*HI and *Apal* sites creating  
117 pRPa $\Delta$ -*GFP* that contains the *GFP* gene fused to the aldolase 3'UTR.

118 The reporter constructs were digested with *Asc*I, ethanol precipitated and resuspended in water prior  
119 to transfection. 3  $\mu$ g DNA was mixed with  $1 \times 10^7$  2T1 cells suspended in transfection buffer (21) in a  
120 2 mm cuvette (BioRad) and electroporated in an Amaxa Nucleofector (Lonza Biosciences) using

121 program X-001. Cells were allowed to recover for 6h at 37 °C, 5% CO<sub>2</sub> in HMI-11T antibiotics before  
122 selection with 2.5 µg/mL Hygromycin and 0.5 µg/mL Phleomycin.

123

## 124 **Induction of iron starvation**

125 The iron chelator deferoxamine (Sigma Aldrich) was added to *T. brucei* cell cultures at 25 µM to  
126 induce iron starvation. For serum switching starvation experiments, cells were harvested at 800 × g,  
127 washed once in HMI-11T without serum, and resuspended in HMI-11T containing either 10% fetal calf  
128 serum (Labtech) or 10% donor dog serum (Labtech) with and without the addition of 200 µg/ml holo  
129 bovine transferrin (Sigma).

130

## 131 **Western blots**

132 Cells were counted, harvested at 800 × g, the pellet resuspended at 1 × 10<sup>6</sup> cells/µl in 1 × SDS loading  
133 buffer (Melford), and the cells lysed for 5 min at 95 °C. The lysate was separated on a 10% Tris-acetate  
134 SDS-PAGE gel, transferred to a PVDF membrane using a Trans blot Turbo semi-dry blotter (Biorad) and  
135 blocked overnight in 5% w/w ECL blocking agent (GE Healthcare) in TTBS (0.05% Tween 20 in Tris  
136 buffered saline). The expression of GFP was detected with a rabbit anti-GFP primary (1:1000, Roche)  
137 and an anti-rabbit-HRP conjugated secondary (1:20,000, GE Healthcare) with expression level  
138 quantified with Clarity ECL chemiluminescent detection (Biorad) in a ChemiDoc XPS+ system (Biorad).  
139 The detection of tubulin using mouse anti-tubulin KMX-1 primary (1:100; Gift from Keith Gull, Oxford)  
140 and anti-mouse-HRP secondary (1:20,000, GE Healthcare) was used to verify loading

141

## 142 **Luciferase assays**

143 The expression of the fLUC reporter gene was quantified by incubating 100 µl of a 5 × 10<sup>5</sup> cells/ml *T.*  
144 *brucei* culture in white 96 well plates with an equal volume the OneGlo luciferase reagent (Promega)  
145 for 5 min, with the resulting luminescence detected using a Fluoroskan ascent FL plate reader (Thermo  
146 Scientific) with a 10 sec acquisition time per well.

147

## 148 **Immunofluorescence microscopy**

149 Approximately  $1 \times 10^6$  cells were harvested by centrifugation at  $800 \times g$ , washed once with  $1 \times$  PBS  
150 and allowed to adhere to glass slides for 5 min. Slides were incubated with 4% PFA for 5 min at room  
151 temperature, washed twice in  $1 \times$  PBS for 5 minute. A drop of Fluoroshield with DAPI (Sigma) was  
152 added to the slide, a coverslip was applied and the slide examined on a Leica DMRXA2 fluorescent  
153 microscope.

154

## 155 **Results**

156

### 157 **Identification of the ESAG6-3'UTR**

158 In order to investigate whether the 3'UTR of the *TbTfR* is involved in its dynamic regulation it was  
159 necessary to first identify the size of the 3'UTR, which due to its telomeric location is not present in  
160 the previous polyadenylation site mappings (22, 23). As expression of ESAG7 may not be essential (6),  
161 we focussed our efforts on ESAG6. To identify the size of the *ESAG6 3'UTR* expressed in the active  
162 BES1, a two-step RT-PCR was performed with an oligo-dT adapter primer to transcribe cDNA and  
163 subsequent amplification of the *ESAG6-3'UTR* with primers specific for BES1 *ESAG6* open reading  
164 frame and the adapter sequence. Sequencing of the resulting amplicons identified that  
165 polyadenylation occurred at closely spaced sites 317 bp, 330 bp or 335 bp downstream of the *ESAG6*  
166 stop codon. The observed heterogeneity and 3'UTR length are consistent with previous observations  
167 in *T. brucei* (22, 23). Sequence alignment revealed a high level of sequence conservation between the  
168 13 copies of the *ESAG6-3'UTR* found in the 15 different BES (6), with pairwise comparison of the  
169 nucleotide sequences revealing 91.0 – 99.7 % identity (24) (Fig 1 & S1 Fig). Interestingly the 3'UTR of  
170 the putative genomic copy of ESAG6 (Tb927.9.15680) was less conserved, with only 38.9 – 42.2 %  
171 sequence identity with the telomeric sequences (24) (S2 Fig).

```

BES1_ESAG6-3'UTR  GGCACGATGGCACCGAACTGDCCTTACCCGAAACATTTGGTAAATGGCAGGTTGGGAAAC-ATGGCCALLCA
Conservation      *****
BES1_ESAG6-3'UTR  ATACCTATTTCCTTTTATTGGGGGAMCAATGGCCAAAGTAAAGTAAAGTTCCAGTGGGAGTGGTATGTTGGTAT
Conservation      *****
BES1_ESAG6-3'UTR  GGGCTGGCTEACGAAGATGTGTGCTGGCCATGCGGTATGTCACAGCTAGCAGAAACGCTCAACAAAPAGAGTGTAA
Conservation      *****
BES1_ESAG6-3'UTR  GGGGAAATGTACACCAACTATGTAAATT-TCAG--GAGACTATTTTCRAATTTAGTTACACAAAGTAAATGTCA
Conservation      *****
BES1_ESAG6-3'UTR  AATPATGCCAAGCTATAAAGCAAA
Conservation      *****

```

172

173 **Fig 1. Identification of the *ESAG6*-3'UTR.** The observed polyadenylation sites are indicated with  
174 triangles above the sequence, and sequence identify with the other 13 BES *ESAG6*-3'UTR sequences  
175 indicated by stars below the sequence. Sequences were aligned with T-Coffee (25).

176

## 177 Fusion of the *ESAG6*-3'UTR represses reporter protein expression

178 To investigate the potential involvement of the *ESAG6*-3'UTR in regulation of the *TbTfR*, constructs  
179 were created with the reporter genes *GFP* or firefly Luciferase (*fLUC*) flanked by either the aldolase  
180 (*ALD*) 3'UTR or the 335 bp *ESAG6*-3'UTR (Fig 2). The reporter genes were located downstream of a  
181 RRNA promoter and integrated into the tagged *RRNA* locus in the 2T1 cell line to ensure high levels of  
182 constitutive transcription by RNA pol I whilst avoiding positional effects (18).

183

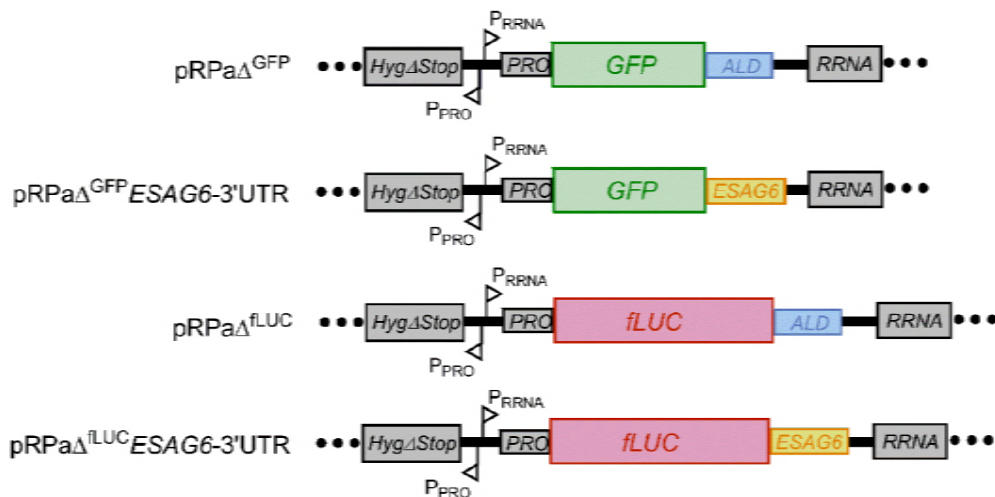

184

185 **Fig 2. Reporter constructs used in this study.** RNA processing regions and promoters: *HygΔStop* -  
186 portion of the hygromycin resistance targets the Hyg-tagged *RRNA* locus;  $P_{RRNA}$  - *RRNA* promoter;  $P_{PRO}$



187 - procyclin promoter; *PRO* - procyclin 5'UTR; *ALD* - Aldolase 3'UTR; *ESAG6* - *ESAG6*-3'UTR; GFP – green  
188 fluorescent protein; fLUC – firefly luciferase.

189

190 Observation of the GFP reporter cell lines by immunofluorescence microscopy confirmed cytosolic  
191 expression of GFP, with the *ESAG6*-3'UTR reporter cells producing noticeable diminished GFP signal  
192 compared to the *ALD*-3'UTR reporter cells (Fig 3A). The steady state expression level of GFP during  
193 exponential growth was quantified by western blotting with anti-GFP antibodies for three  
194 independent clones, revealing that expression of GFP in the *ESAG6*-3'UTR reporter cells was repressed  
195 by ~80% compared to the *ALD*-3'UTR reporter cells (Fig 3B). Similarly, measurement of luciferase  
196 activity in the fLUC expressing cell lines revealed a significant difference between the *ESAG6*-3'UTR  
197 and *ALD*-3'UTR for each of three independent clones, with the fusion of the *ESAG6*-3'UTR repressing  
198 the expression level by ~90% (Fig 3C). The level of expression of *TbTfR* has previously been reported  
199 to increase up to 5-fold at high cell density (26), and we observe similar cell density dependent changes  
200 in luciferase activity in the *ESAG6*-3'UTR fusion (Fig 3D). Together, these data demonstrate that fusion  
201 of the *ESAG6*-3'UTR to a reporter gene is sufficient to repress the expression of the reporter under  
202 normal growth conditions.

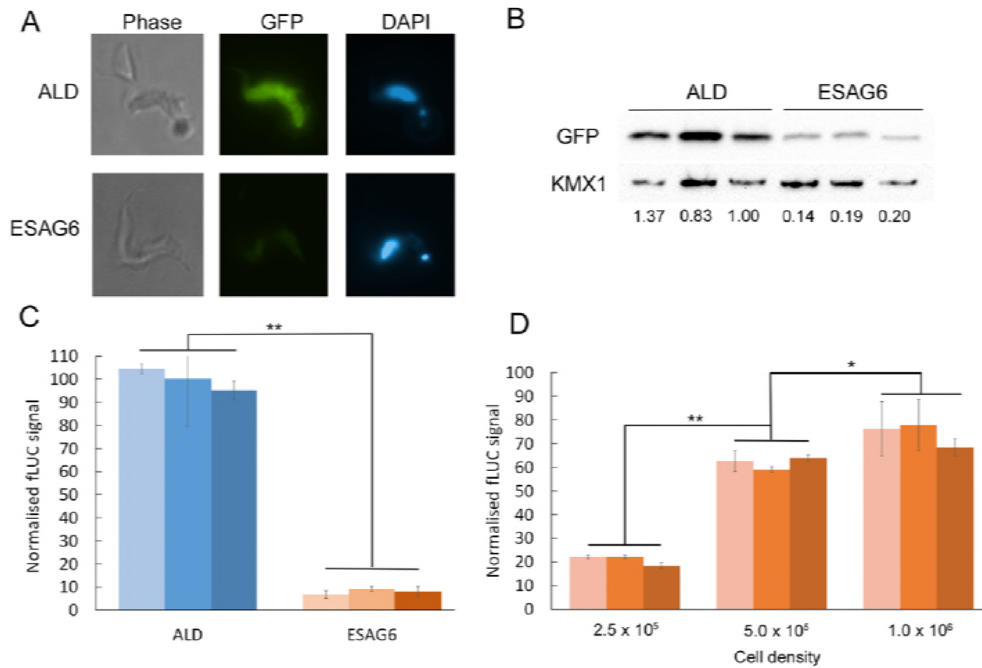

203

204 **Fig 3. Reporter protein expression under normal culture conditions.** A. Immunofluorescence of GFP  
 205 reporter constructs. B. Quantification of GFP expression by western blotting, using anti-GFP and KMX1  
 206 as a loading control. C. Luciferase activity assay, D. Luciferase activity of the *ESAG6-3'UTR* cell line  
 207 varies with cell density. Data in panel B-D represents three independent clones of each cell line.  
 208 Luciferase signal is normalised to the aldolase-3'UTR signal; error bars are SEM for triplicate  
 209 measurements. ALD – aldolase-3'UTR, ESAG6 – *ESAG6-3'UTR*. \*  $p < 0.05$ , \*\*  $p < 0.001$ .

210

## 211 **The ESAG6 3'UTR mediates iron starvation response**

212 The addition of the iron chelator deferoxamine to *T. brucei* cells reduces the availability of Tf-bound  
 213 iron, and results in a 2.4 – 3.7-fold increase in *TbTfR* expression after 5 hours (9). Treatment of the  
 214 fLUC reporter cell lines with deferoxamine for 5 hours had no significant effect on the luciferase  
 215 activity of the *ALD-3'UTR* reporter cells (Fig 4A). Conversely, deferoxamine treatment increased the  
 216 luciferase activity of the *ESAG6-3'UTR* reporter cells by ~10-fold, so that the activity was approaching  
 217 that of the *ALD-3'UTR* reporter cells (Fig 4A).

218 Switching *T. brucei* cells with an active BES1 from growth in media supplemented with 10% bovine  
 219 serum to growth in media supplemented with 10% canine serum results in rapid 2.5 – 5-fold

220 upregulation of *ESAG6* and *ESAG7* at the mRNA and protein level, as the *TbTfR* expressed from BES1  
221 has a particularly low affinity for canine Tf (3, 9, 10, 26). The addition of excess bovine Tf to media  
222 supplemented with 10% canine serum prevents the upregulation of *TbTfR* as cells are no longer  
223 starved of iron, validating the specificity of the response (3, 4). Switching the fLUC reporter cell lines  
224 to canine serum supplemented media for 5 hours increased the luciferase activity of the *ESAG6*-3'UTR  
225 reporter cells by ~3.5-fold compared to growth in canine serum supplemented media with excess  
226 bovine Tf (Fig 4B). The addition of excess bovine Tf to bovine serum supplemented media for 5 hours  
227 had no significant effect on the luciferase activity of either reporter cell line (S3 Fig).

228 The fLUC *ESAG6*-3'UTR reporter cell line was used to investigate the temporal profile of the response  
229 to serum switching. In the absence of additional bovine Tf, a time-dependent increase in luciferase  
230 activity was observed in cells grown in canine serum supplemented media compared to cells grown in  
231 bovine serum supplemented media (Fig 4C), with a significant 1.4-fold increase observed as early as  
232 30 minutes after serum switching and increasing to ~10-fold after 6 hours. Addition of bovine Tf to the  
233 canine serum supplemented media reduced the magnitude of the increase to ~2-fold after 6 hours  
234 but did not completely negate the effect, suggesting that the amount of additional bovine Tf used  
235 here is not sufficient to completely restore iron intake.

236 These data demonstrate that fusion of the *ESAG6*-3'UTR to a reporter gene is sufficient to confer  
237 dynamic regulation of reporter expression in response to iron starvation conditions, and that  
238 upregulation is more rapid than previously thought. The changes in the luciferase activity observed  
239 here are broadly consistent with the magnitude of increase in TfR expression previously observed for  
240 the iron starvation response, with levels as high as 10-fold reported (26, 27). The slightly larger  
241 changes observed with the fLUC reporter compared *TbTfR* might be due to the superior quantitation  
242 and dynamic range of the bioluminescence assay compared to western blotting with polyclonal anti-  
243 *TbTfR* antibodies.

244

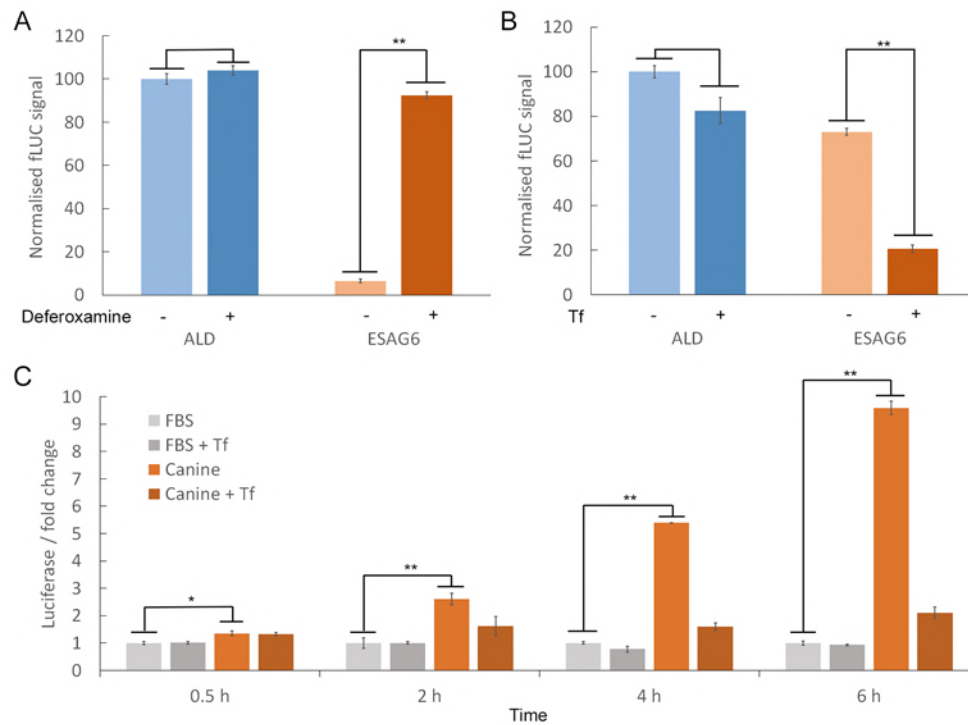

245

246 **Fig 4. Luciferase expression in the *ESAG6-3'UTR* reporter increases under iron starvation conditions.**

247 A. Luciferase activity of *fLUC ESAG6-3'UTR* reporter cells treated with 25  $\mu$ M deferoxamine for 5 h,

248 normalised to untreated ALD signal. B. Luciferase activity of *fLUC ESAG6-3'UTR* reporter cells switched

249 to HMI11-T + 10% dog serum for 5 h with or without the addition of 200  $\mu$ g/ml bovine transferrin (Tf),

250 normalised to untreated ALD signal. C. Time course of luciferase activity of *fLUC ESAG6-3'UTR* reporter

251 cells switched to HMI11-T + 10% dog serum for 5 h with or without the addition of 200  $\mu$ g/ml bovine

252 Tf, normalised to signal in HMI11-T + 10% FCS. ALD – aldolase 3'UTR, ESAG6 – ESAG6 3'UTR. Error bars

253 are SEM for triplicate measurements, \*  $p < 0.05$ , \*\*  $p < 0.001$ .

254

## 255 Discussion

256 Our data demonstrate that fusion of the *ESAG6-3'UTR* to reporter genes is sufficient to confer a

257 specific response to iron starvation conditions that increases the expression of the reporter with a

258 magnitude and temporal profile consistent with that previously observed for *TbTfR* upregulation.

259 Since the reporter gene is located in a *RRNA* locus, this provides evidence that the dynamic regulation  
260 of *TbTfR* expression is independent of transcription within the BES site or location at the telomere,  
261 and decouples the rapid dynamic regulation of *TbTfR* expression from subsequent VSG switching  
262 events (3, 4, 11). To our knowledge, this is the first time that a *T. brucei* 3'UTR has been demonstrated  
263 to be involved in dynamic post-transcriptional regulation of a gene in response to a specific nutritional  
264 stimulus, rather than mediated through irreversible developmental regulation in response to lifecycle  
265 changes.

266 We have demonstrated that fusion of the *ESAG6* 3'-UTR causes the expression of the gene product  
267 to be repressed under basal conditions, which is consistent with the low level *ESAG6* mRNA present  
268 despite being located on the highly transcribed VSG polycistronic transcriptional unit. Under iron  
269 starvation conditions the repressive effect of the *ESAG6* 3'UTR is reduced, resulting in an increase of  
270 expression that is most likely driven by an increase in transcript abundance, as *TbTfR* increases equally  
271 at the mRNA and protein level (9, 10). The involvement of the 3'UTR in iron starvation response  
272 suggest that it contains secondary structural elements or sequence motifs that are recognised by RNA  
273 binding protein(s) (RBPs), but the high level of sequence conservation in the UTR makes it likely that  
274 any such features are more extensive than the 16-mer regulatory sequence identified in VSG mRNAs  
275 (28). Further experiments will be required to identify any regulatory features present in the *ESAG6* 3'-  
276 UTR, and whether they have a positive or negative regulatory role.

277 *TbTfR* is a multi-gene family that occurs in a promoter proximal position in the 15 BES, and Ansong  
278 *et al.* have previously used RT-PCR analysis to propose that ~20% of *ESAG6* mRNA is transcribed from  
279 the 14 silent BES due promoter-proximal de-repression of silencing (29). Recent analysis of the surface  
280 proteome in culture adapted monomorphic cell line by Ghadella *et al.* (30) detected VSGs and ESAGs  
281 from multiple BES in addition to the major active BES, which the authors suggest is due to the  
282 occurrence of low abundance of a subpopulation of cells that have switched their active BES. Analysis  
283 of our own global proteomic data sets (19, 31, 32) supports their conclusion, as although the most  
284 abundant ESAGs detected correlate with the BES of the most abundant VSG, several other VSGs from

285 'silent' BES are detected at lower abundance along with their corresponding ESAGs. Therefore we  
286 propose that the transcription of *TbTfR* from supposedly 'silent' BES can at least in part be explained  
287 by the occurrence of a low abundance of subpopulation of cells that have switched their active BES,  
288 and that any contribution of de-repression of silent BES to the rapid dynamic regulation of *TbTfR*  
289 expression is likely to be minimal.

290

## 291 **Conclusions**

292 Taken together, the data presented here demonstrate that fusion of the *ESAG6*-3'UTR to a reporter  
293 gene is sufficient to confer a specific response to iron starvation conditions that increases the  
294 expression of the reporter with a magnitude and temporal profile consistent with that previously  
295 observed for *TbTfR* upregulation. The effect is independent from transcription within the expression  
296 site or location at the telomere, and is therefore decoupled from VSG switching events. The *fLUC*-  
297 *ESAG6*-3'UTR reporter system is experimentally tractable and provides a simple and reproducible  
298 signal-and-response system in cultured monomorphic cells with which to elucidate a signalling  
299 pathway essential for the clinically-relevant bloodstream form parasite

300

## 301 **Author Contribution:**

302 CB carried out the investigation, participated in formal analysis and helped with writing the original  
303 draft; WL carried out the investigation and sequence alignments; NF carried the investigation and  
304 participated in formal analysis, ACG & HJB carried out the investigation, MDU conceived and the  
305 study, conducted formal analysis, and helped with writing the original draft, and it review & editing.  
306 All authors gave final approval for publication.

307

## 308 Acknowledgments

309 We thank Dr. Sam Alford (London School of Hygiene and Tropical Medicine, UK) for providing the  
310 pRPa $\Delta$ <sup>GFP</sup> X vector, Prof Phillip A. Yates (Oregon Health & Science University, USA) for providing the  
311 pCRm-LUC-HYG vector, and Prof. Keith Gull (School of Pathology, Oxford, UK) for providing the KMX-  
312 1 antibody.

## 313 Funding

314 CB and MDU are funded by a New Investigator Research Grant from the BBSRC (BB/M009556/1).  
315 The funders had no role in study design, data collection and analysis, decision to publish, or  
316 preparation of the manuscript.

## 317 References

- 318 1. Salmon D, Geuskens M, Hanocq F, Hanocq-Quertier J, Nolan D, Ruben L, et al. A novel  
319 heterodimeric transferrin receptor encoded by a pair of VSG expression site-associated genes in  
320 *Trypanosoma brucei*. *Cell*. 1994;78:75-86.
- 321 2. Steverding D, Stierhof YD, Fuchs H, Tauber R, Overath P. Transferrin-binding protein complex  
322 is the receptor for transferrin uptake in *Trypanosoma brucei*. *J Cell Biol*. 1995;131:1173-82.
- 323 3. Bitter W, Gerrits H, Kieft R, Borst P. The role of transferrin-receptor variation in the host  
324 range of *Trypanosoma brucei*. *Nature*. 1998;391:499-501.
- 325 4. Gerrits H, Mußmann R, Bitter W, Kieft R, Borst P. The physiological significance of transferrin  
326 receptor variations in *Trypanosoma brucei*. *Mol Biochem Parasitol*. 2002;119:237-47.
- 327 5. Cross GAM. Antigenic variation in trypanosomes: secrets surface slowly. *Bioessays*.  
328 1996;18:283-91.
- 329 6. Hertz-Fowler C, Figueiredo LM, Quail MA, Becker M, Jackson A, Bason N, et al. Telomeric  
330 expression sites are highly conserved in *Trypanosoma brucei*. *PloS one*. 2008;3(10):e3527.

- 331 7. Salmon D, Hanocq-Quertier J, Paturiaux-Hanocq F, Pays A, Tebabi P, Nolan DP, et al.  
332 Characterization of the ligand-binding site of the transferrin receptor in *Trypanosoma brucei*  
333 demonstrates a structural relationship with the N-terminal domain of the variant surface  
334 glycoprotein. EMBO J. 1997;16:7272-8.
- 335 8. Mehlert A, Wormald MR, Ferguson MA. Modeling of the N-glycosylated transferrin receptor  
336 suggests how transferrin binding can occur within the surface coat of *Trypanosoma brucei*. PLoS  
337 Pathog. 2012;8(4):e1002618.
- 338 9. Fast B, Kremp K, Boshart M, Steverding D. Iron-dependent regulation of transferrin receptor  
339 expression in *Trypanosoma brucei*. Biochem J. 1999;342:691-6.
- 340 10. Mußmann R, Janssen H, Calafat J, Engstler M, Ansorge I, Clayton C, et al. The expression level  
341 determines the surface distribution of the transferrin receptor in *Trypanosoma brucei*. Mol  
342 Microbiol. 2003;47(1):23-35.
- 343 11. van Luenen HG, Kieft R, Mussmann R, Engstler M, ter Riet B, Borst P. Trypanosomes change  
344 their transferrin receptor expression to allow effective uptake of host transferrin. Mol Microbiol.  
345 2005;58(1):151-65.
- 346 12. Steverding D. The significance of transferrin receptor variation in *Trypanosoma brucei*.  
347 Trends Parasitol. 2003;19(3):125-7.
- 348 13. Jefferies D, Tebabi P, Pays E. Transient activity assays of the *Trypanosoma brucei* variant  
349 surface glycoprotein gene promoter: control of gene expression at the posttranscriptional level. Mol  
350 Cell Biol. 1991;11(1):338-43.
- 351 14. Roditi I, Furger A, Ruepp S, Schurch N, Butikofer P. Unravelling the procyclin coat of  
352 *Trypanosoma brucei*. Mol Biochem Parasitol. 1998;91:117-30.
- 353 15. Mayho M, Fenn K, Craddy P, Crosthwaite S, Matthews K. Post-transcriptional control of  
354 nuclear-encoded cytochrome oxidase subunits in *Trypanosoma brucei*: evidence for genome-wide  
355 conservation of life-cycle stage-specific regulatory elements. Nucleic Acids Res. 2006;34(18):5312-  
356 24.



- 357 16. Monk SL, Simmonds P, Matthews KR. A short bifunctional element operates to positively or  
358 negatively regulate ESAG9 expression in different developmental forms of *Trypanosoma brucei*. *J*  
359 *Cell Sci.* 2013;126(Pt 10):2294-304.
- 360 17. Rico E, Ivens A, Glover L, Horn D, Matthews KR. Genome-wide RNAi selection identifies a  
361 regulator of transmission stage-enriched gene families and cell-type differentiation in *Trypanosoma*  
362 *brucei*. *PLoS Pathog.* 2017;13(3):e1006279.
- 363 18. Alsford S, Kawahara T, Glover L, Horn D. Tagging a *Trypanosoma brucei* rRNA locus improves  
364 stable transfection efficiency and circumvents inducible expression position effects. *Mol Biochem*  
365 *Parasitol.* 2005;144(2):142-8.
- 366 19. Urbaniak MD, Martin DM, Ferguson MA. Global quantitative SILAC phosphoproteomics  
367 reveals differential phosphorylation is widespread between the procyclic and bloodstream form  
368 lifecycle stages of *Trypanosoma brucei*. *Journal of proteome research.* 2013;12(5):2233-44.
- 369 20. Soysa R, Carter NS, Yates PA. A dual luciferase system for analysis of post-transcriptional  
370 regulation of gene expression in Leishmania. *Mol Biochem Parasitol.* 2014;195(1):1-5.
- 371 21. Schumann Burkard G, Jutzi P, Roditi I. Genome-wide RNAi screens in bloodstream form  
372 trypanosomes identify drug transporters. *Mol Biochem Parasitol.* 2011;175(1):91-4.
- 373 22. Siegel TN, Hekstra DR, Wang X, Dewell S, Cross GA. Genome-wide analysis of mRNA  
374 abundance in two life-cycle stages of *Trypanosoma brucei* and identification of splicing and  
375 polyadenylation sites. *Nucleic Acids Res.* 2010;38(15):4946-57.
- 376 23. Kolev NG, Franklin JB, Carmi S, Shi H, Michaeli S, Tschudi C. The transcriptome of the human  
377 pathogen *Trypanosoma brucei* at single-nucleotide resolution. *PLoS Pathog.* 2010;6(9):e1001090.
- 378 24. Stothard P. The Sequence Manipulation Suite: JavaScript programs for analyzing and  
379 formatting protein and DNA sequences. *BioTechniques.* 2010;28:1102-4.
- 380 25. Notredame C, Higgins D, Heringa J. T-Coffee: A novel method for multiple sequence  
381 alignment. *J Mol Biol.* 2000;302:205-17.

- 382 26. Mussmann R, Engstler M, Gerrits H, Kieft R, Toaldo CB, Onderwater J, et al. Factors affecting  
383 the level and localization of the transferrin receptor in *Trypanosoma brucei*. J Biol Chem.  
384 2004;279(39):40690-8.
- 385 27. Schwartz KJ, Peck RF, Tazeh NN, Bangs JD. GPI valence and the fate of secretory membrane  
386 proteins in African trypanosomes. J Cell Sci. 2005;118(Pt 23):5499-511.
- 387 28. Ridewood S, Ooi CP, Hall B, Trenaman A, Wand NV, Sioutas G, et al. The role of genomic  
388 location and flanking 3'UTR in the generation of functional levels of variant surface glycoprotein in  
389 *Trypanosoma brucei*. Mol Microbiol. 2017;106(4):614-34.
- 390 29. Ansorge I, Steverding D, Melville S, Hartmann C, Clayton C. Transcription of 'inactive'  
391 expression sites in African trypanosomes leads to expression of multiple transferrin receptor RNAs in  
392 bloodstream forms. Mol Biochem Parasitol. 1999;101:81-94.
- 393 30. Gadelha C, Zhang W, Chamberlain JW, Chait BT, Wickstead B, Field MC. Architecture of a  
394 Host-Parasite Interface: Complex Targeting Mechanisms Revealed Through Proteomics. Mol Cell  
395 Proteomics. 2015;14(7):1911-26.
- 396 31. Urbaniak MD, Guther MLS, Ferguson MAJ. Comparative SILAC Proteomic Analysis of  
397 *Trypanosoma brucei* Bloodstream and Procyclic Lifecycle Stages. PloS one. 2012;7(5):e36619.
- 398 32. Domingo-Sananes MR, Szoor B, Ferguson MA, Urbaniak MD, Matthews KR. Molecular  
399 control of irreversible bistability during trypanosome developmental commitment. J Cell Biol.  
400 2015;211(2):455-68.

401

## 402 **Supporting Information**

403 **S1 Figure. Sequence alignment of the BES ESAG6 3'UTRs.** The observed polyadenylation sites are  
404 indicated with triangles above the sequence, and sequence identify indicated by stars below the  
405 sequence. Sequences were aligned with T-Coffee [1].

406 **S2 Fig. Sequence alignment of the BES and putative genomic ESAG6 3'UTRs.** The observed  
407 polyadenylation sites are indicated with triangles above the sequence, and sequence identify  
408 indicated by stars below the sequence. Sequences were aligned with T-Coffee [1]

409 **S3 Fig. Luciferase reporter expression in normal media is unaffected by addition of bovine**  
410 **transferrin.** Luciferase activity of *fLUC ESAG6-3'UTR* reporter cells grown in HMI11-T + 10% FBS with  
411 or without the addition of 200 mg/ml bovine transferrin, normalised to ALD signal. ALD – aldolase  
412 3'UTR, ESAG6 – ESAG6 3'UTR. Error bars are SEM for triplicate measurements, NS =  $p > 0.05$ .

**Dynamic regulation of the *Trypanosoma brucei* transferrin receptor in response to iron starvation is mediated *via* the 3'UTR**

Corinna Benz, Winston Lo, Nadin Fathallah, Ashley Connor-Guscott, Henry Benns, Michael D Urbaniak\*

Biomedical and Life Sciences, Faculty of Health and Medicine, Lancaster University, Lancaster LA1 4YG, UK

\* Corresponding author. E-mail: [m.urbania@lancaster.ac.uk](mailto:m.urbania@lancaster.ac.uk)

**Supplementary data**

Supplementary Figure S1. Sequence alignment of the BES ESAG6 3'UTRs.

Supplementary Figure S2. Sequence alignment of the BES and putative genomic ESAG6 3'UTRs.

Supplementary Figure S3. Luciferase reporter expression in normal media is unaffected by addition of bovine transferrin.





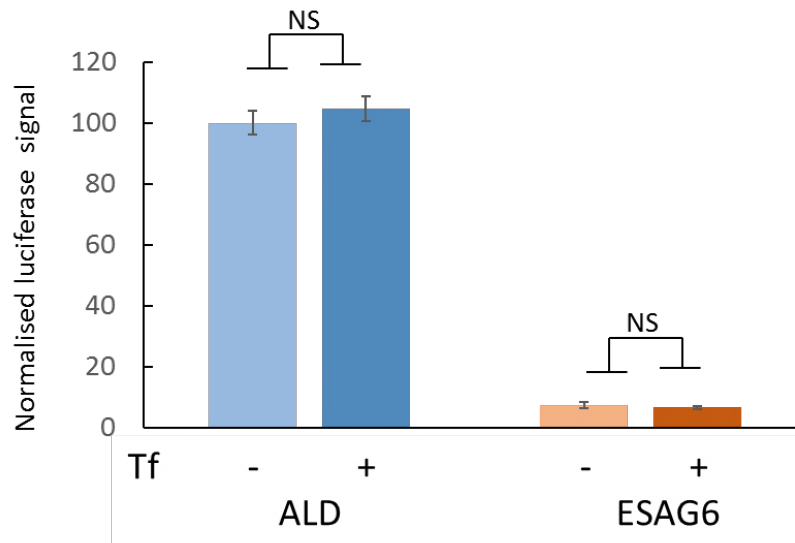

**Supplementary Figure S3. Luciferase reporter expression in normal media is unaffected by addition of bovine transferrin.** Luciferase activity of *flUC ESAG6-3'UTR* reporter cells grown in HMI11-T + 10% FBS with or without the addition of 200  $\mu\text{g/ml}$  bovine transferrin, normalised to ALD signal. ALD – aldolase 3'UTR, ESAG6 – ESAG6 3'UTR. Error bars are SEM for triplicate measurements, NS =  $p > 0.05$ .

#### References:

1 Notredame, C., Higgins, D., Heringa, J. 2000 T-Coffee: A novel method for multiple sequence alignment. *J. Mol. Biol.* **302**, 205-217.
